# Supplementary material for: Transfection activity and the mechanism of pDNA-complexes based on the hybrid of low-generation PAMAM and branched PEI-1.8k
Source: Royal Society of Chemistry journal article supplement (doi:10.1039/c3mb70261h), 2013-09-30
Supplement: c3mb70261h.pdf [file c3mb70261h.pdf]

1 **Transfection activity and mechanism of pDNA-complexes based on the hybrid of**  
2 **low-generation PAMAM and branched PEI-1.8k**

3 Duanwen Cao, Linghao Qin, Huan Huang, Min Feng, Shirong, Pan\*, and Jianhai Chen\*  
4 Department of Pharmaceutical Science, Nanfang Hospital, Southern Medical University and  
5 Cardiovascular Laboratory, The First Affiliated Hospital, Sun Yat-sen University, Guangzhou  
6 510080, China

7  
8

**SUPPLEMENTARY DATA**

9 **1. Synthesis procedures of PAPEs**

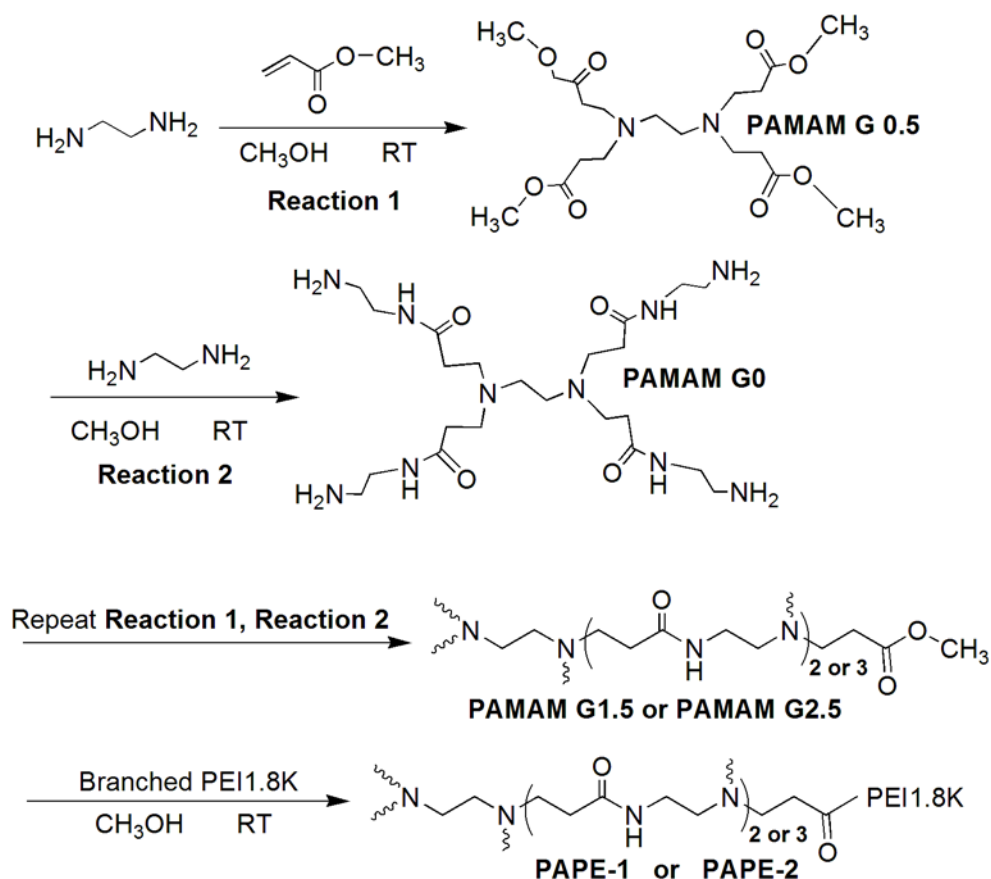

10

11 **Scheme 1.** Synthesis procedures of PAPEs.

12 **2. Characterization of PAMAM G1.5 and PAMAM G 2.5**

13 PAMAM G1.5 and PAMAM G2.5 dendrimers with EDA as the core were prepared  
14 according to the procedures reported by Tomalia and Wu.<sup>1,2</sup> After purification, they were  
15 characterized by FTIR and  $^1\text{H}$  NMR. As given in Fig. S1, the peaks at about  $3305\text{ cm}^{-1}$  (NH),  
16  $2953$  and  $2830\text{ cm}^{-1}$  (CH stretch),  $1736\text{ cm}^{-1}$  (C=O),  $1257\text{ cm}^{-1}$  (C-O),  $1650$  and  $1540\text{ cm}^{-1}$

1 (-CONH-),  $1437\text{ cm}^{-1}$  (CH bending) and  $1200\text{ cm}^{-1}$  (C-N) are all the characteristics of  
2 PAMAM dendrimers. The  $^1\text{H}$  NMR spectra of PAMAM dendrimers were shown in Fig. S2.  
3 Taking G1.5 for example, Peaks in the range 3.74-3.81, 3.28-3.48, 2.45- 2.76, 2.83-2.98,  
4 2.53-2.58 and 2.45-2.53 ppm were assigned to the protons of  $-\text{COOCH}_3$ ,  $-\text{CONHCH}_2-$ ,  
5  $-\text{NHCH}_2\text{CH}_2\text{CO}-$ ,  $-\text{CH}_2\text{CH}_2\text{N}<$ ,  $-\text{NHCH}_2\text{CH}_2\text{COO}-$  and  $-\text{NHCH}_2\text{CH}_2\text{CONH}-$ , respectively.  
6 Similar  $^1\text{H}$  NMR spectra were observed in PAMAM G2.5 dendrimer. The results of FTIR and  
7  $^1\text{H}$  NMR spectra confirmed the successful synthesis of PAMAMG1.5 and G2.5 dendrimer.

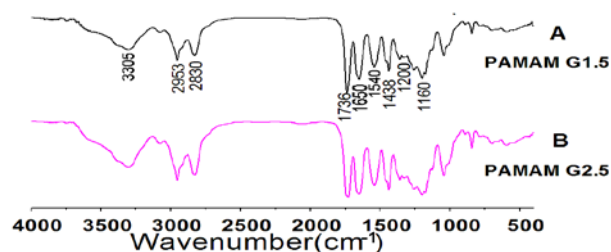

8  
9 **Fig. S1.** The IR spectra of (A) PAMAM G1.5, (B) PAMAM G2.5

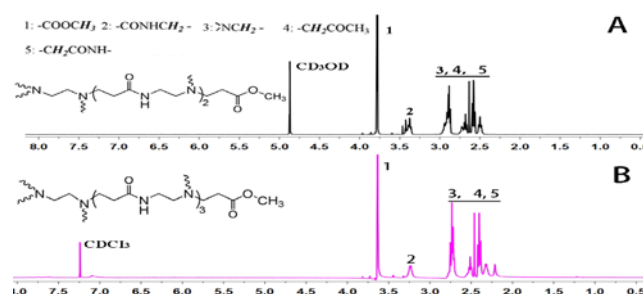

10  
11 **Fig. S2.** The  $^1\text{H}$  NMR spectra of (A) PAMAM G1.5, (B) PAMAM G2.5

### 12 3. Free PAPE effects

13 Previous reports have proved that at  $N/P=3-4$ , almost all DNA is complexed with PEI.<sup>3-6</sup> At  
14  $N/P = 6$  not all PEI is bound in the complex and some free PEI exists.<sup>5,7</sup> However, at  $N/P>4$   
15 the transfection efficiency still increased continually. For example, PEI-25k complexes at  
16  $N/P=10$  showed its highest efficiency. Yue et al. performed a gene transfection in the absence  
17 of serum with PEI complexes prepared at  $N/P=10$ , which has a  $N/P=3$  portion corresponding  
18 to complexed PEI fraction plus a  $N/P=7$  portion corresponding to the free PEI. In comparison

1 with PEI complexes at the N/P= 3, the transfection efficiency in the presence of free PEI was  
2 greatly increased.<sup>8</sup> This fact clearly suggested that addition of free PEI would improve  
3 transfection in the absence of serum. In our study, the similar result was also obtained. In the  
4 Fig. 4A, the transfection efficiency of PAPE complexes at N/P=25 was higher than that at  
5 N/P=13. The amount of free PAPE in the complexes at N/P=25 was larger than that at N/P=13.  
6 Likewise, as shown in Fig. 4B, the transfection efficiency of PAPE complexes at N/P= 75 or  
7 90 was higher than that of at N/P=45. Therefore, these indirectly proved that addition of free  
8 PAPE would also improve the transfection efficiency in absence/presence of serum. In  
9 addition, to directly confirm free PAPE in the complexes could improve the transfection  
10 efficiency of PAPE/pDA complexes in the presence of serum, we performed a cell  
11 transfection with a combination of PAPE-2 complexes fixed at the N/P ratio of 25 and  
12 varying amount of free PAPE-2 which was added into complexes at the time of transfection.  
13 The total amount of PAPE-2 in each combination was equal to complexes prepared at N/P  
14 ratios of 75 and 90, respectively. As shown in Figure S3, transfection efficiency of PAPE-2  
15 complexes at N/P=25 in the presence of different amount of free PAPE-2 was significantly  
16 higher than that of PAPE-2 complexes at N/P=25 alone ( $P < 0.01$ ,  $n=3$ ), but was lower than  
17 that of corresponding control. These results indicated free PAPE-2 in the complexes could  
18 make some contribution to the improved efficiency in the presence of serum.

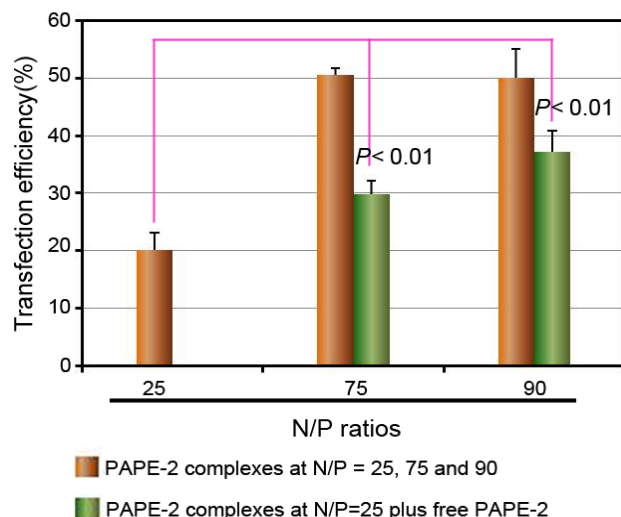

1

2 **Fig. S3.** The transfection efficiencies of PAPE-2 complexes at the N/P ratio of 25 in the  
3 presence of various amount of free PAPE-2. PAPE-2 complexes at N/P = 25, 75 and 90 were  
4 used as controls.

5

## 6 **References**

- 7 1. D. A. Tomalia, H. Baker, J. Dewald, M. Hall, G. Kallos, S. Martin, J. Roeck, J.  
8 Ryder, P. Smith, *Macromolecules*, 1986, **19**, 2466-2468.
- 9 2. H. M. Wu, S. R. Pan, M. W. Chen, Y. Wu, C. Wang, Y. T. Wen, X. Zeng, C. B. Wu,  
10 *Biomaterials*, 2011, **32**, 1619-1634.
- 11 3. M. Ogris, S. Brunner, S. Schuller, R. Kircheis, E. Wagner, *Gene Ther.*, 1999, **6**,  
12 595-605.
- 13 4. P. Erbacher, T. Bettinger, P. Belguise-Valladier, S. Zou, J. L. Coll, J. P. Behr, J. S.  
14 Remy, *J. Gene Med.*, 1999, **1**, 210-222.
- 15 5. Z. Dai, T. Gjetting, M. A. Matthebjerg, C. Wu, T. L. Andresen, *Biomaterials*, 2011,  
16 **32**, 8626-8634.
- 17 6. R. Kircheis, S. Schüller, S. Brunner, M. Ogris, K. H. Heider, W. Zauner, E. Wagner,  
18 *J. Gene Med.*, 1999, **1**, 110-122.
- 19 7. S. Boeckle, K. von Gersdorff, S. van der Piepen, C. Culmsee, E. Wagner, M. Ogris,  
20 *J. Gene Med.*, 2004, **6**, 1102-1111.
- 21 8. Y. Yue, F. Jin, R. Deng, J. Cai, Z. Dai, M. C. Lin, H. F. Kung, M. A. Matthebjerg, T.  
22 L. Andresen, C. Wu, *J. Control Release*, 2011, **152**, 143-151.
